# Supplementary material for: Nationwide Seroprevalence of Leptospirosis among Young Thai Men, 2007–2008
Source: PubMed Central journal article supplement (PMC5805037; doi:10.4269/ajtmh.17-0163), 2017-10-02
Supplement: tpmd170163.SD1.pdf [file tpmd170163.SD1.pdf]

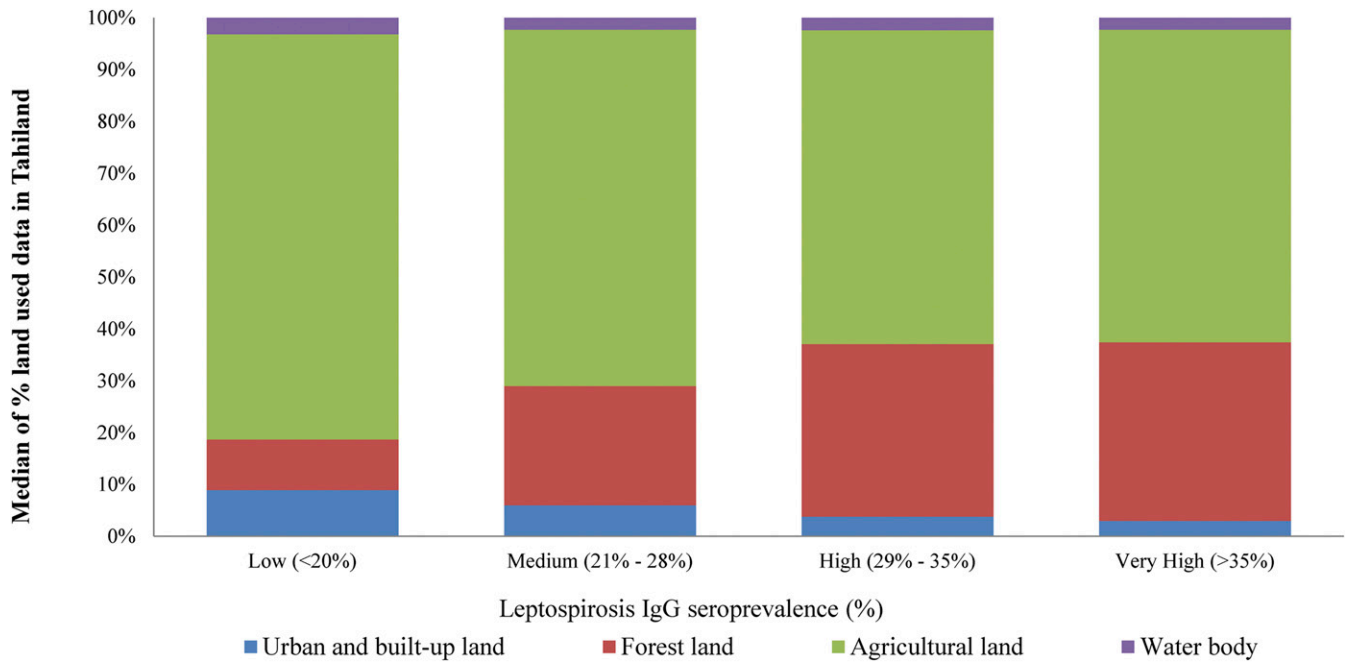

SUPPLEMENTAL FIGURE 1. Percentage of land use data grouped by magnitude of leptospirosis IgG seroprevalence in young Thai men, 2007–2008.
